# Supplementary figures and images for: In-line swimming dynamics revealed by fish interacting with a robotic mechanism
Source: eLife journal article supplement (doi:10.7554/elife.81392), 2023-02-06

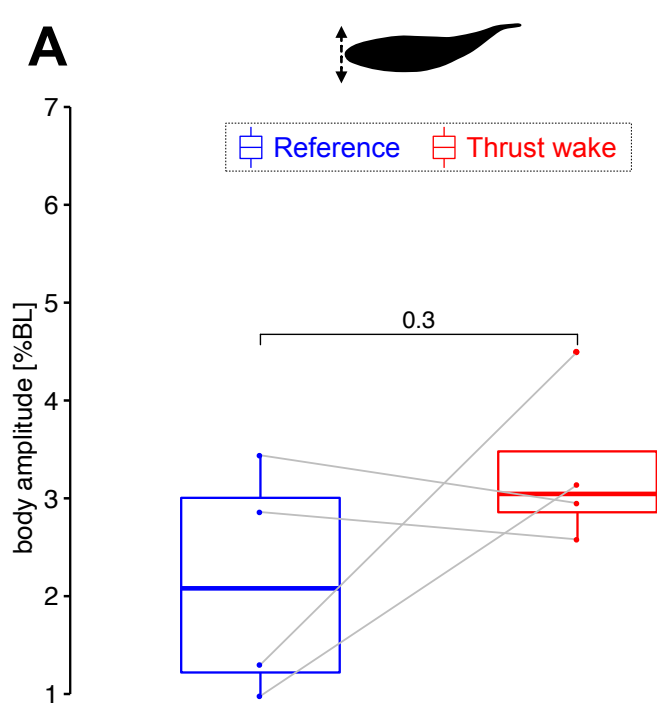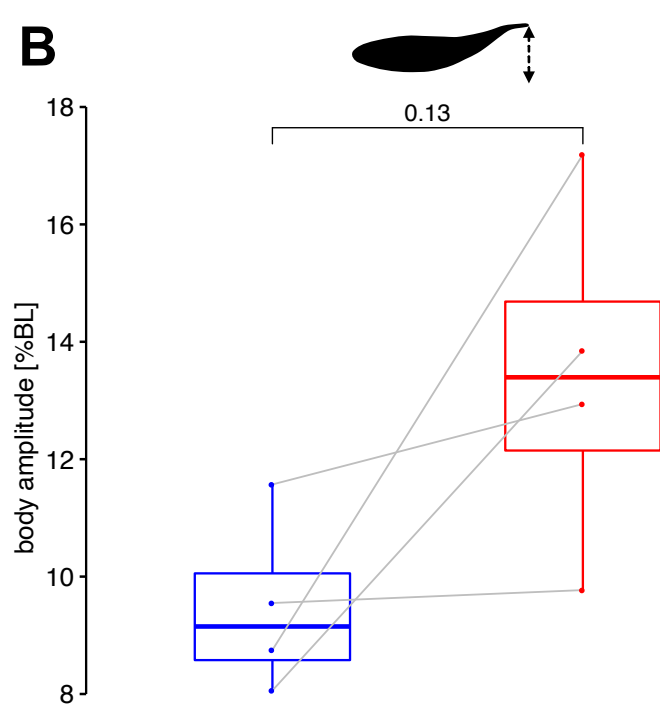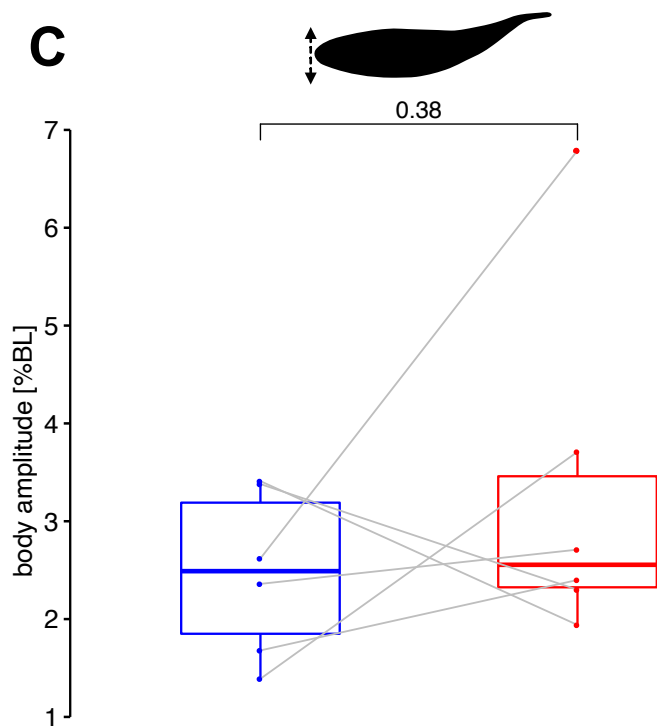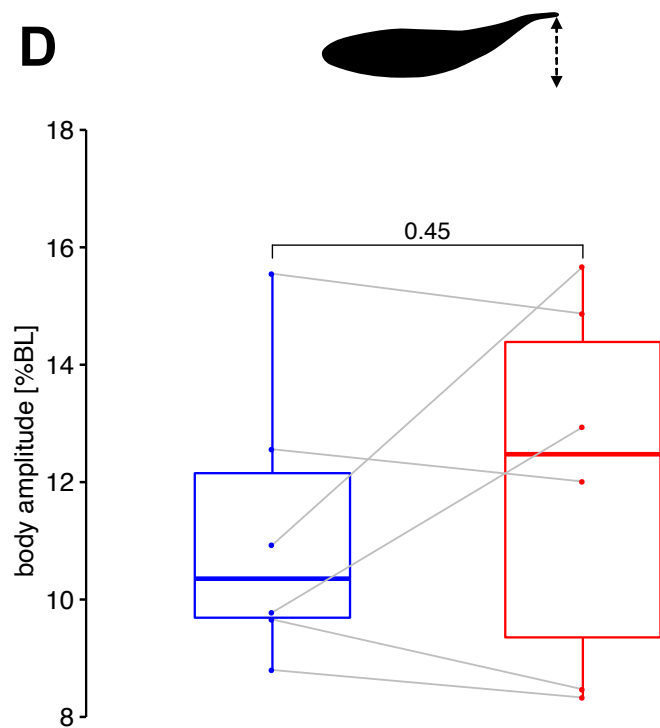

Supplement: supp [file elife-81392-supp-v1.zip]

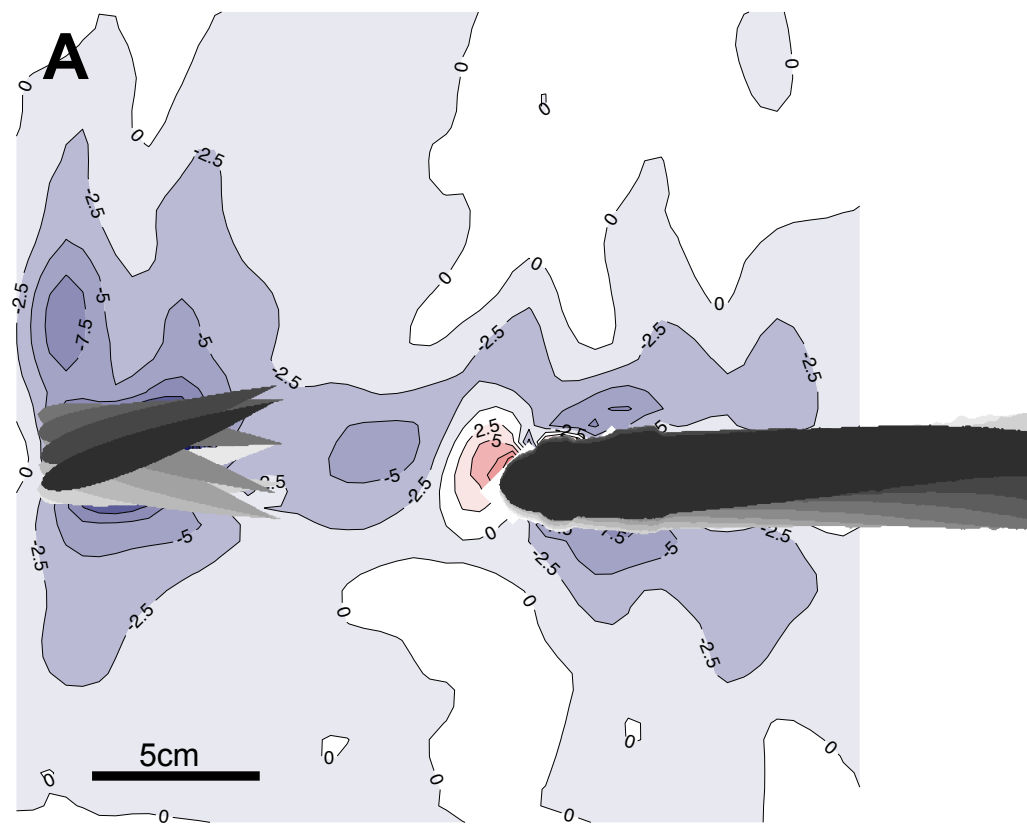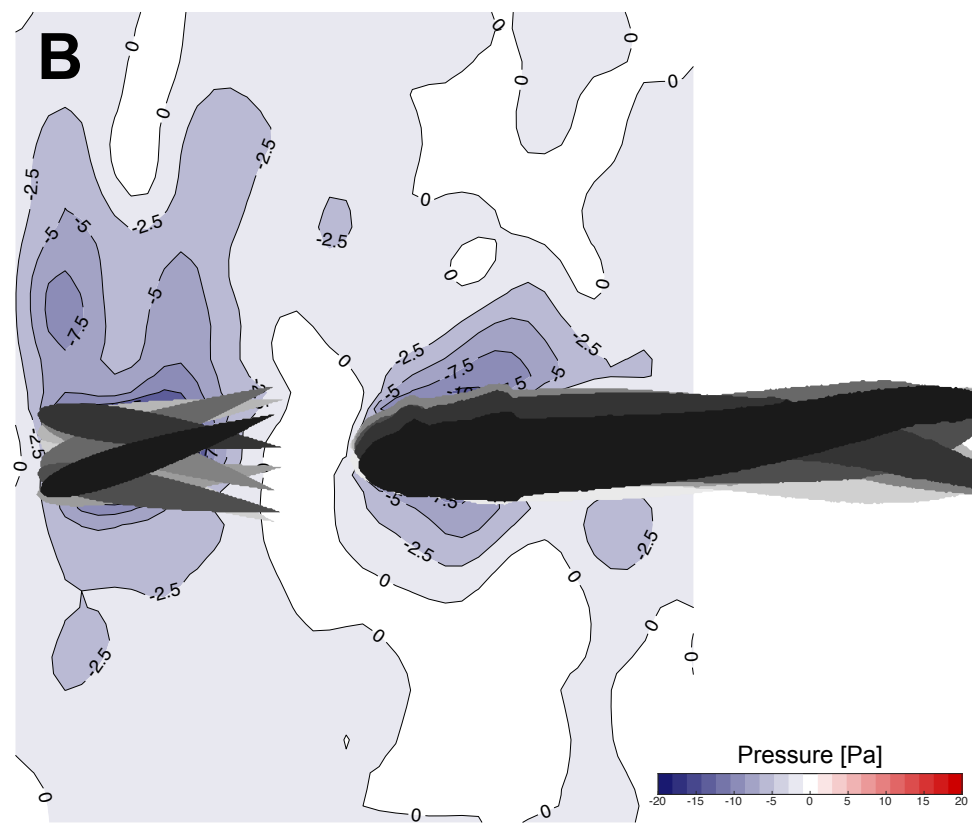

Supplement: supp [file elife-81392-supp-v1.zip]

**A**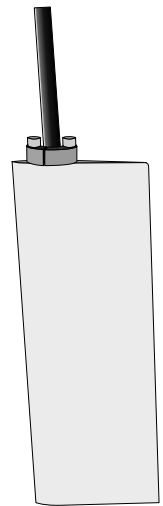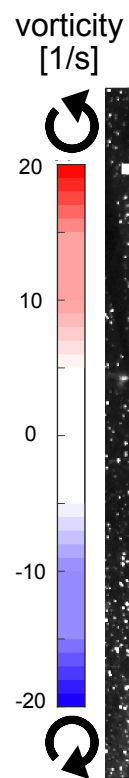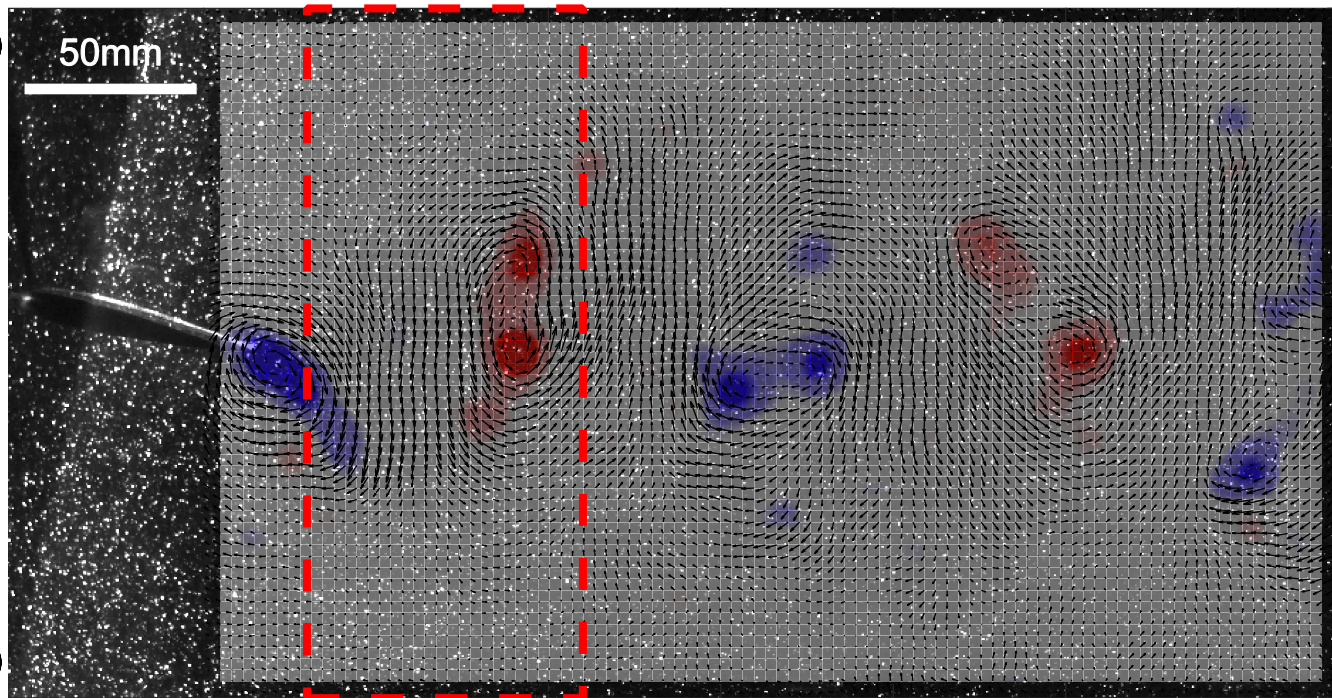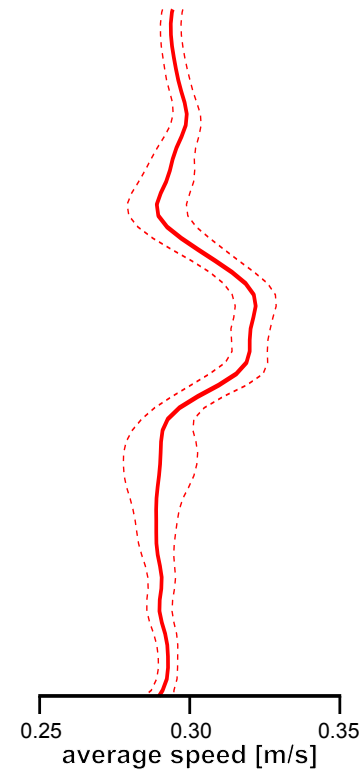**B**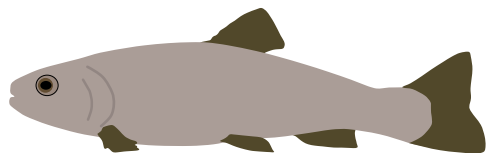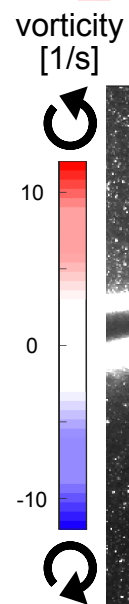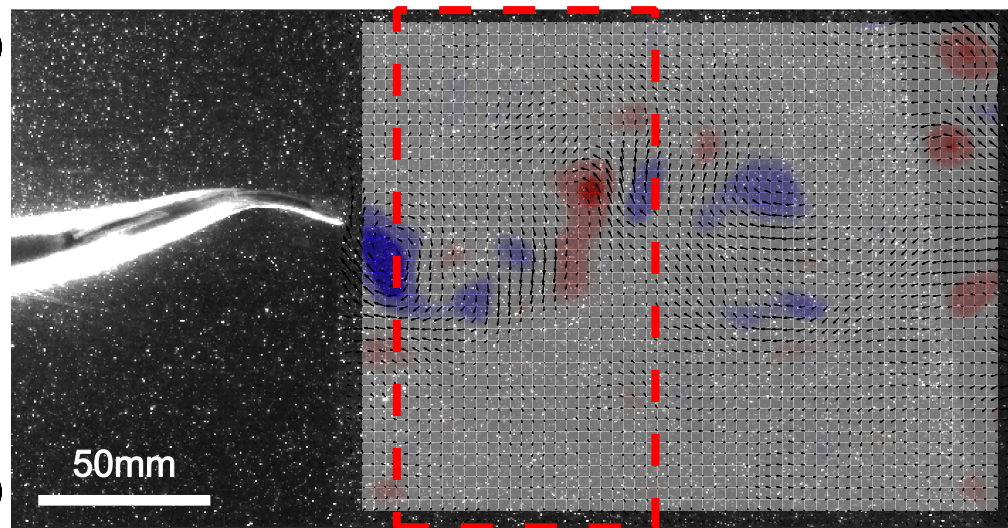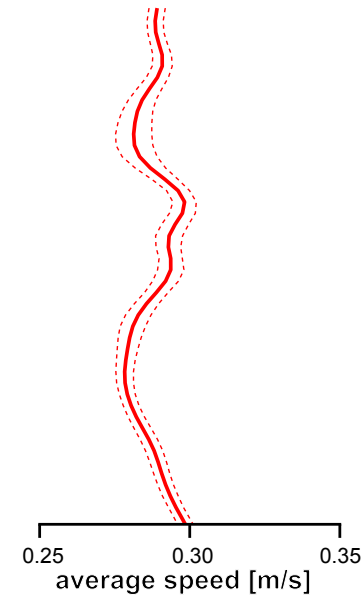

Supplement: supp [file elife-81392-supp-v1.zip]
